# Supplementary figures and images for: An economical synthesis of substituted quinoline-2-carboxylates through the potassium persulfate-mediated cross-dehydrogenative coupling of N-aryl glycine derivatives with olefins
Source: Royal Society of Chemistry journal article supplement (doi:10.1039/c5ob02216a), 2015-12-01

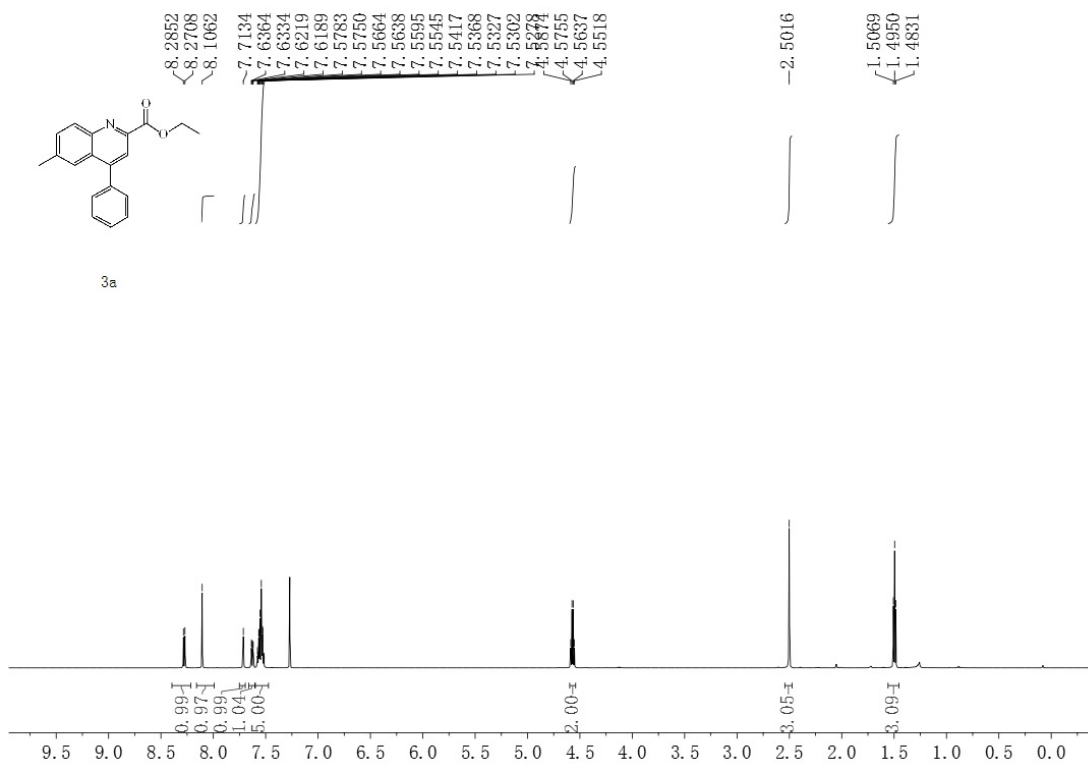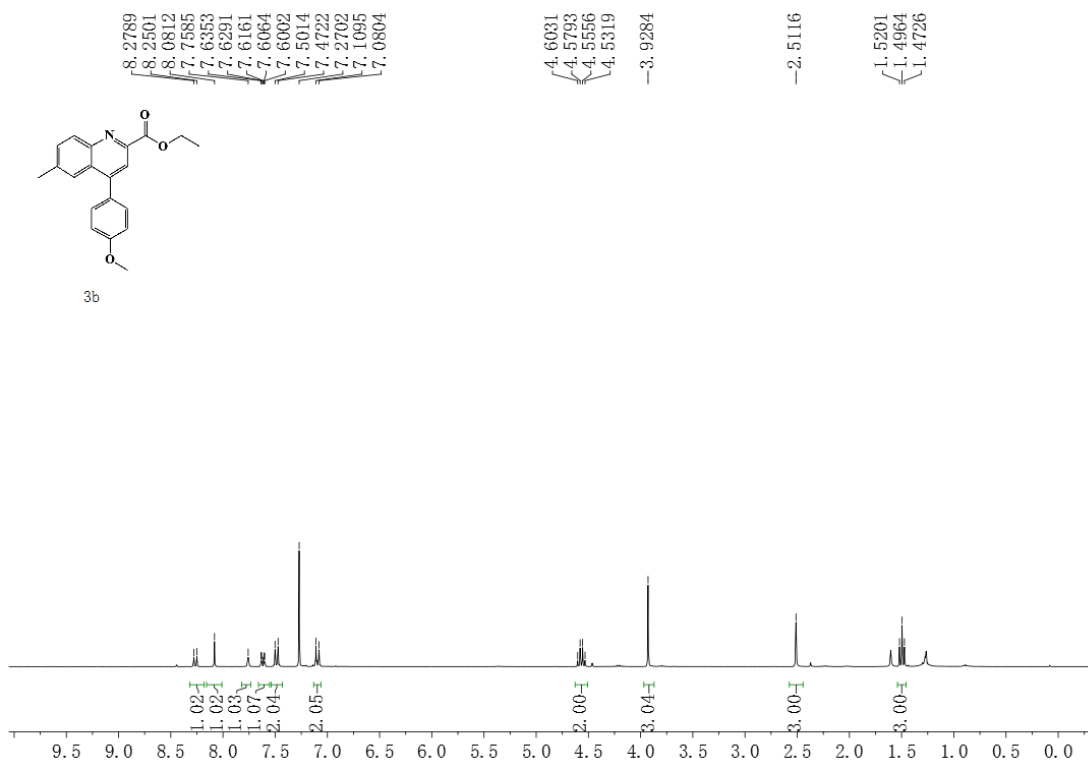

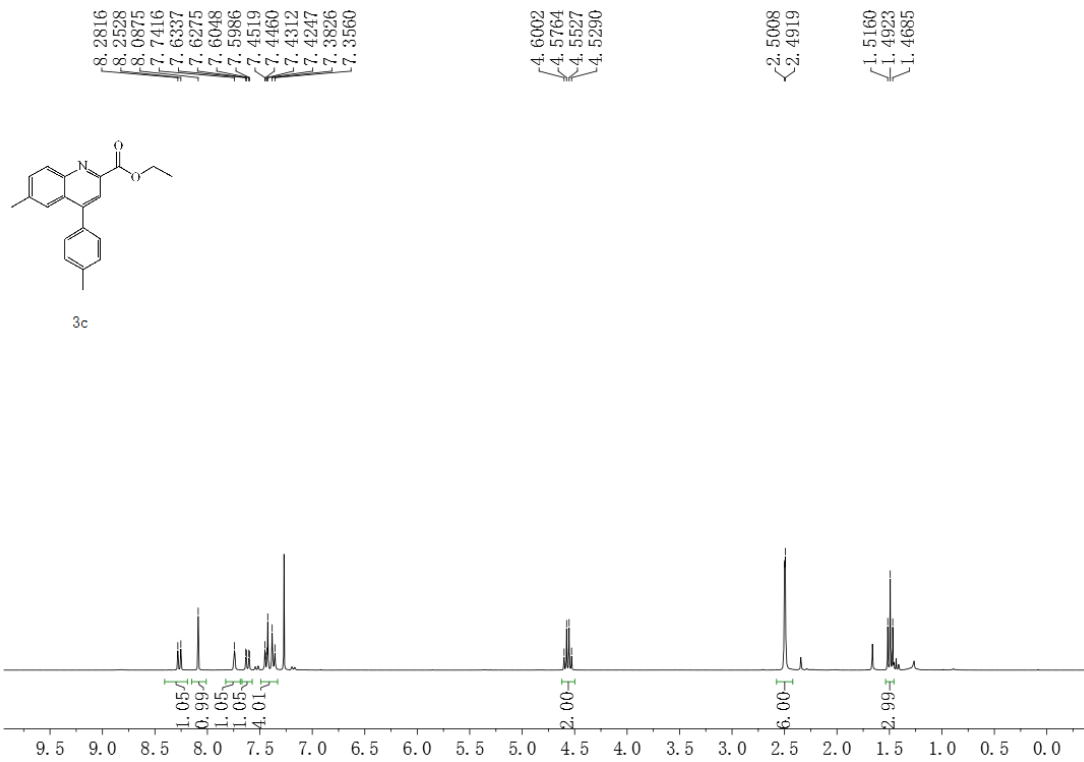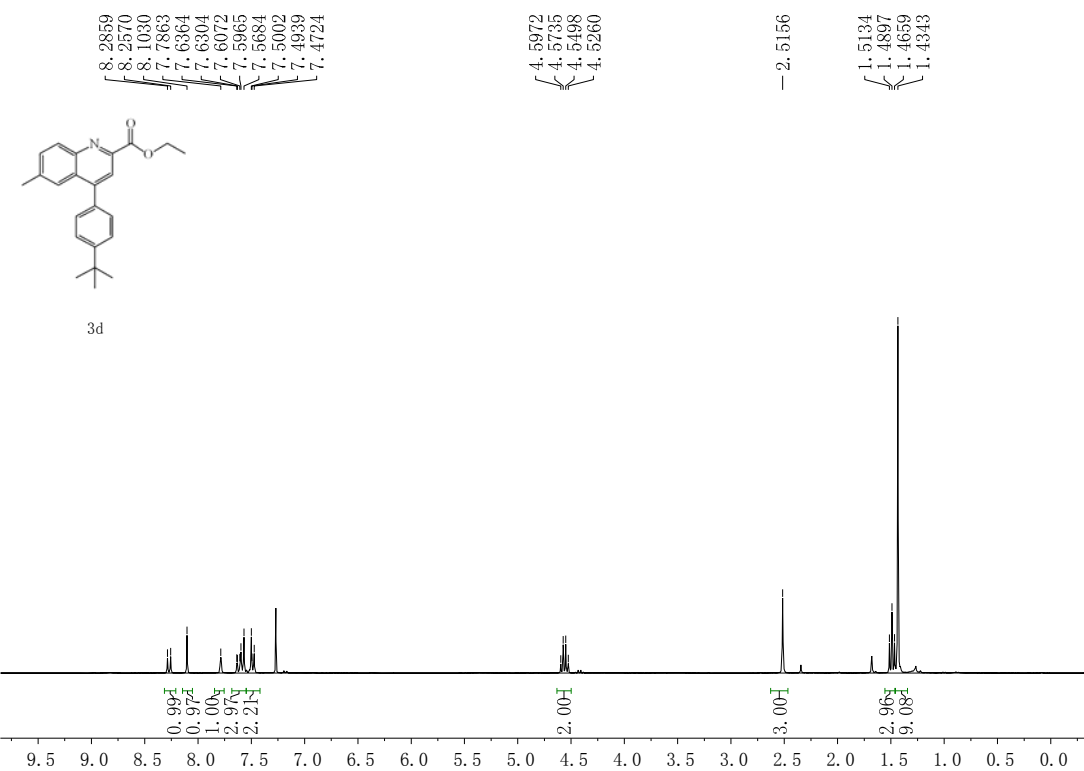

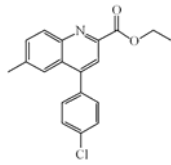

3e

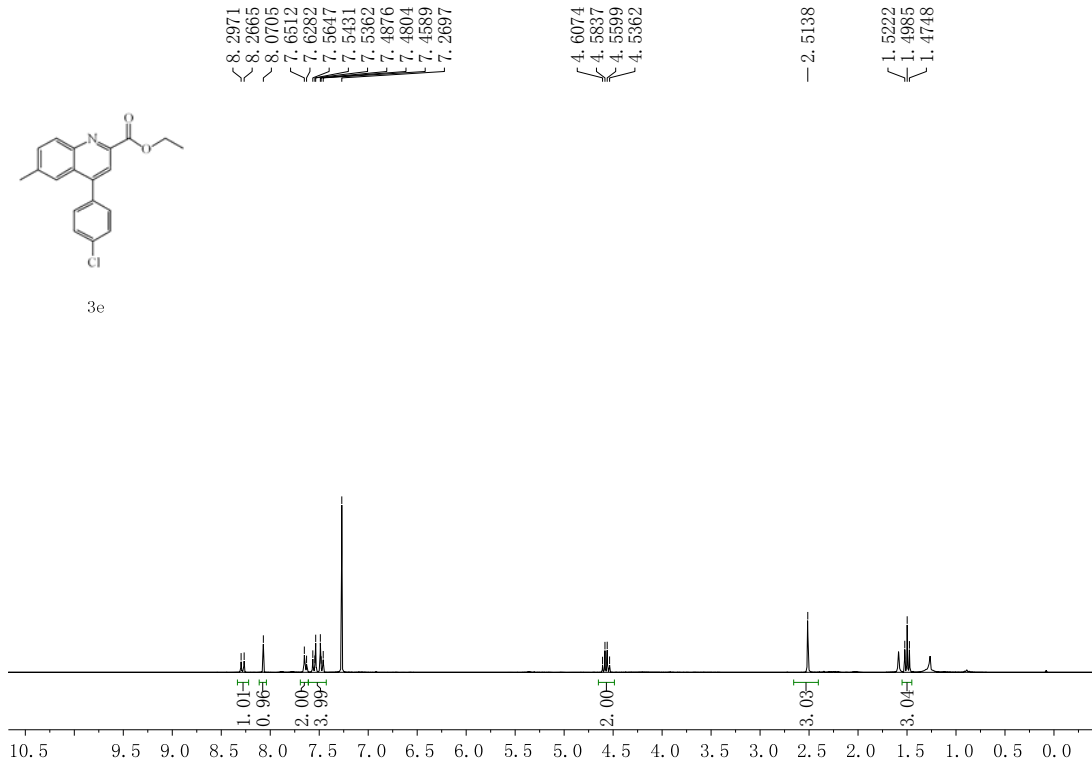

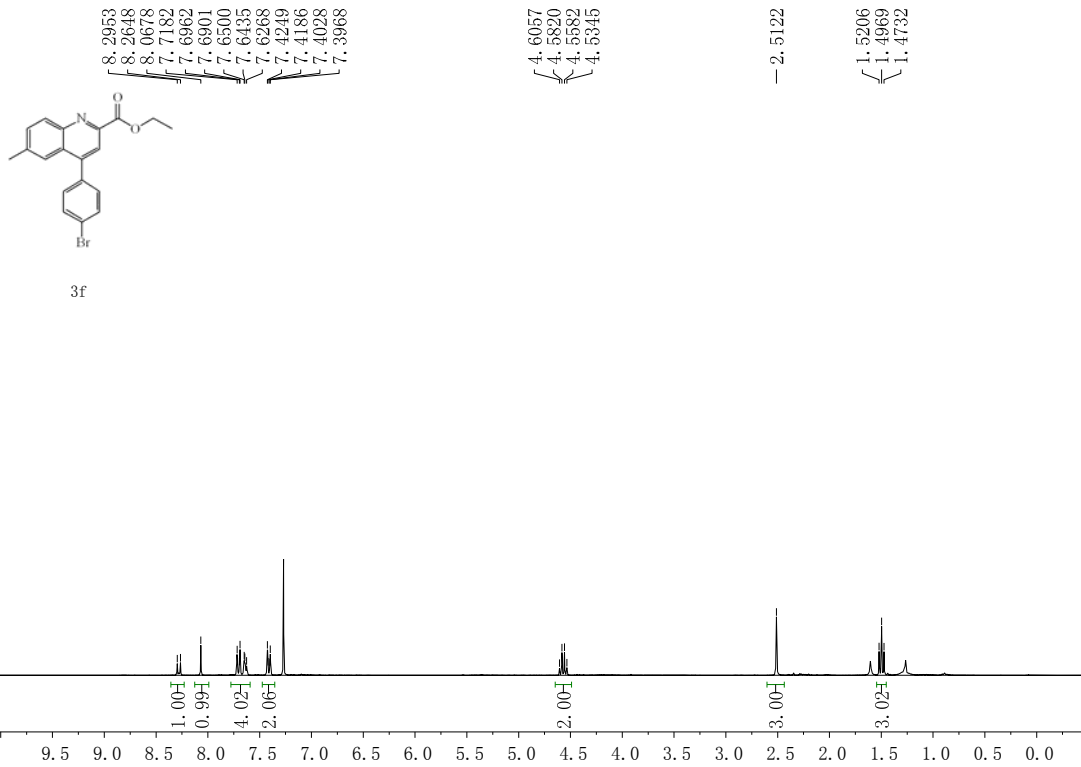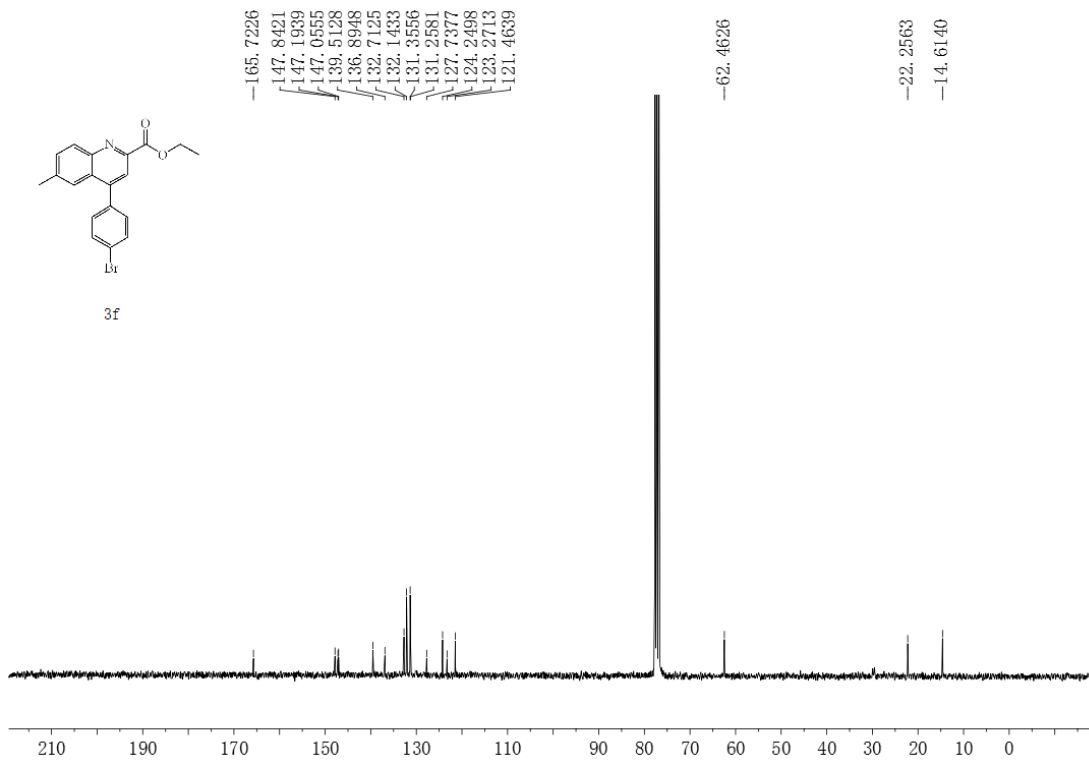

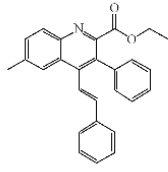

3h

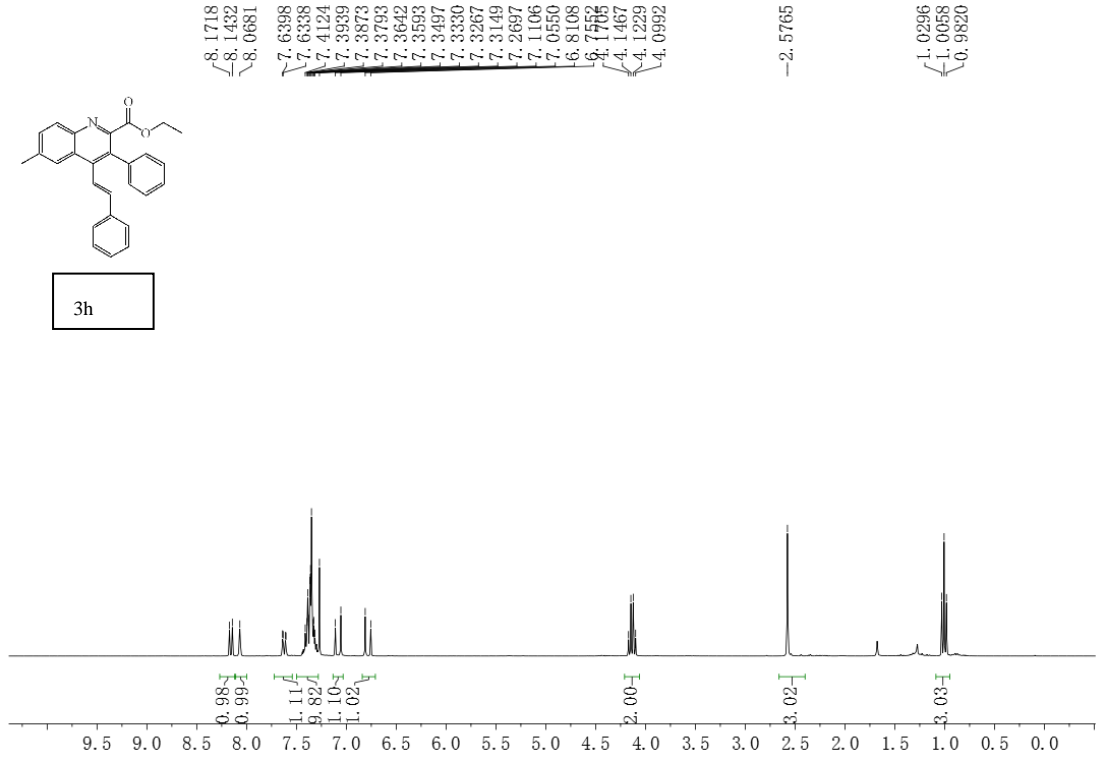

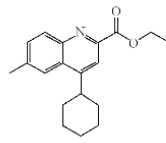

3i

8.2230  
8.1942  
8.0584  
7.8634  
7.6023  
7.5965  
7.5734  
7.5676

4.5953  
4.5716  
4.5479  
4.5242  
3.3839  
3.3747  
3.3475  
3.3378  
3.3197  
3.3101  
-2.6042  
2.0347  
2.0021  
1.9881  
1.9497  
1.8982  
1.8563  
1.6329  
1.6199  
1.5910  
1.5863  
1.5545  
1.5231  
1.4994  
1.4757

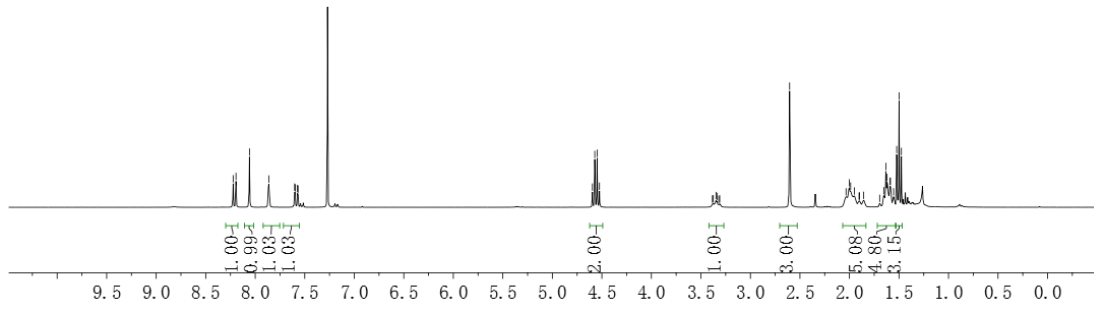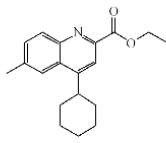

3i

-166.2176  
154.1871  
147.4825  
146.6515  
138.4173  
131.9199  
131.6428  
128.1242  
121.9221  
117.6681  
-62.2288  
39.1604  
33.6381  
27.0426  
26.3778  
22.8869  
14.5854

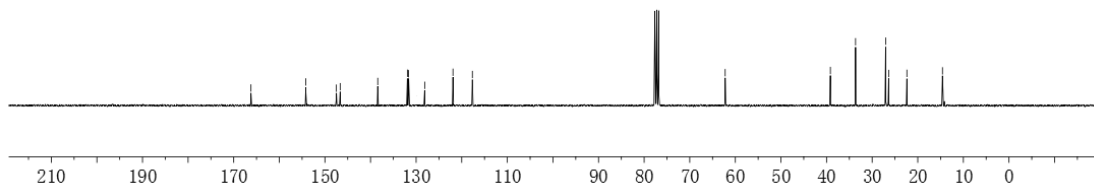

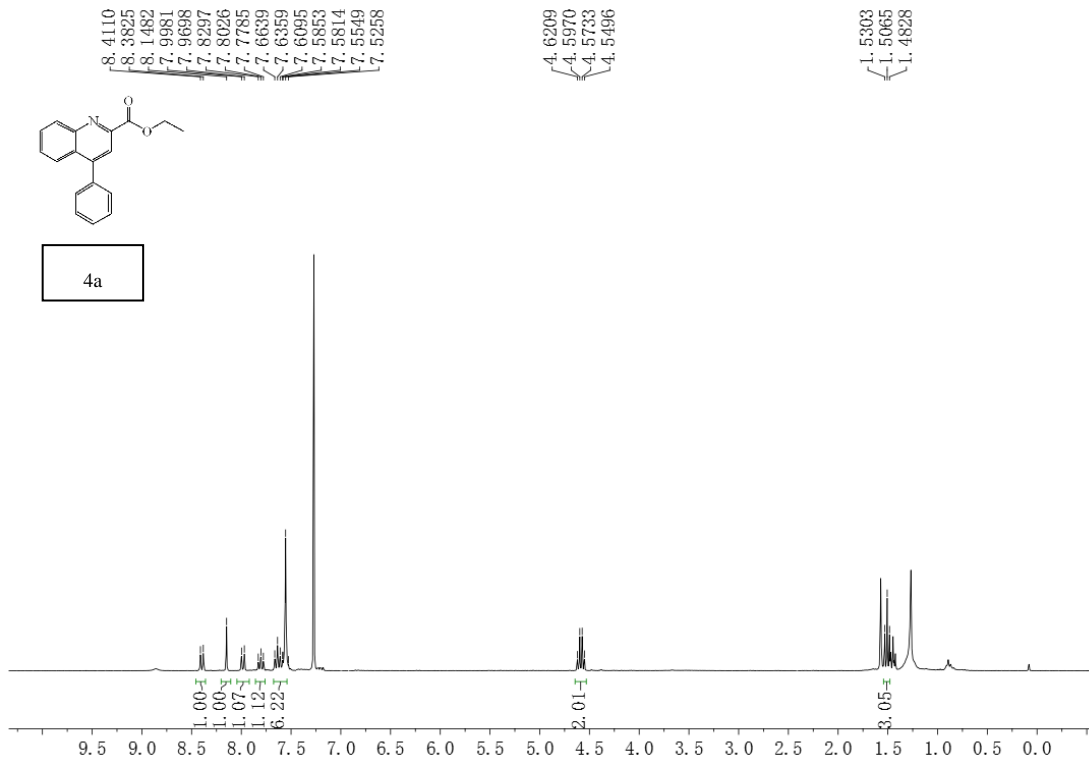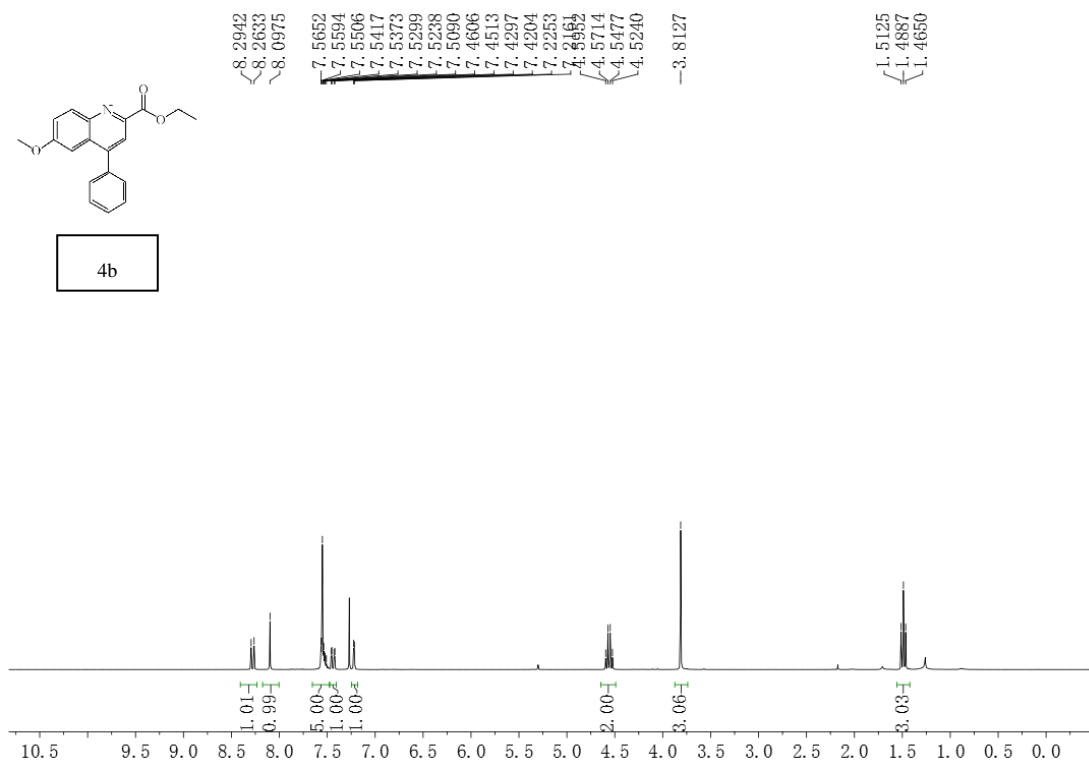

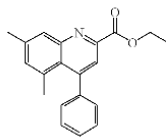

4c

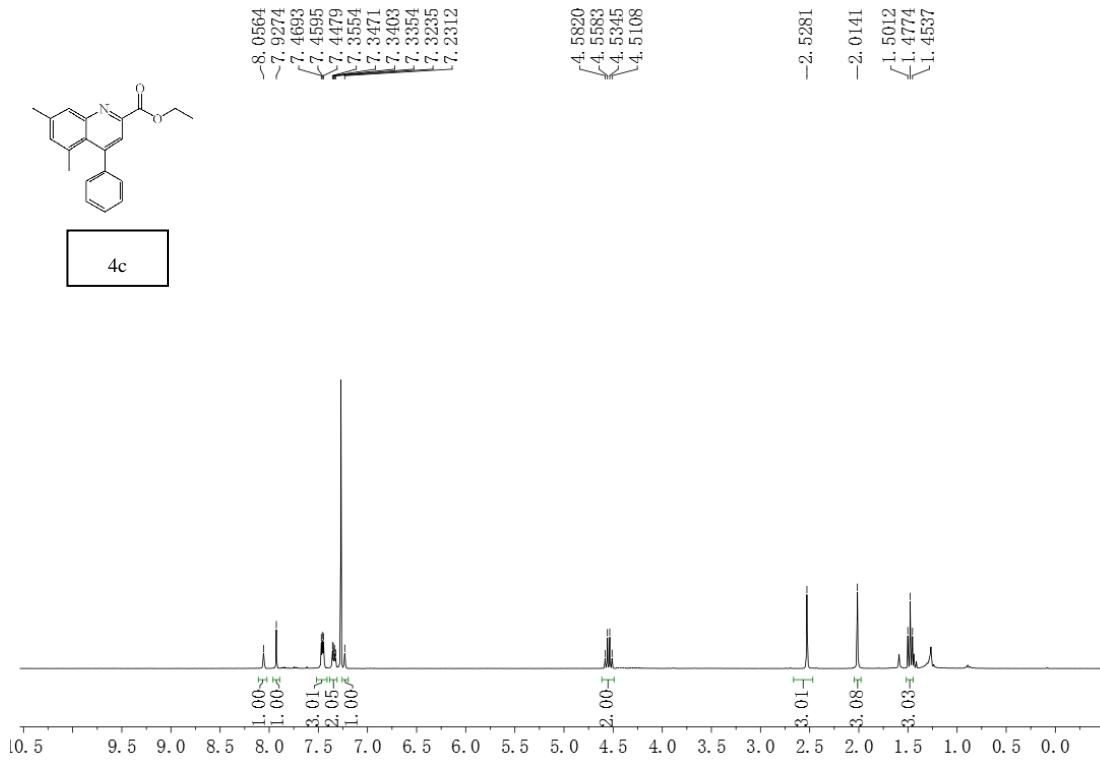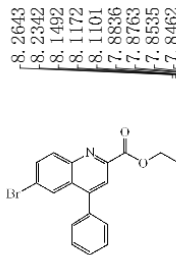

4d

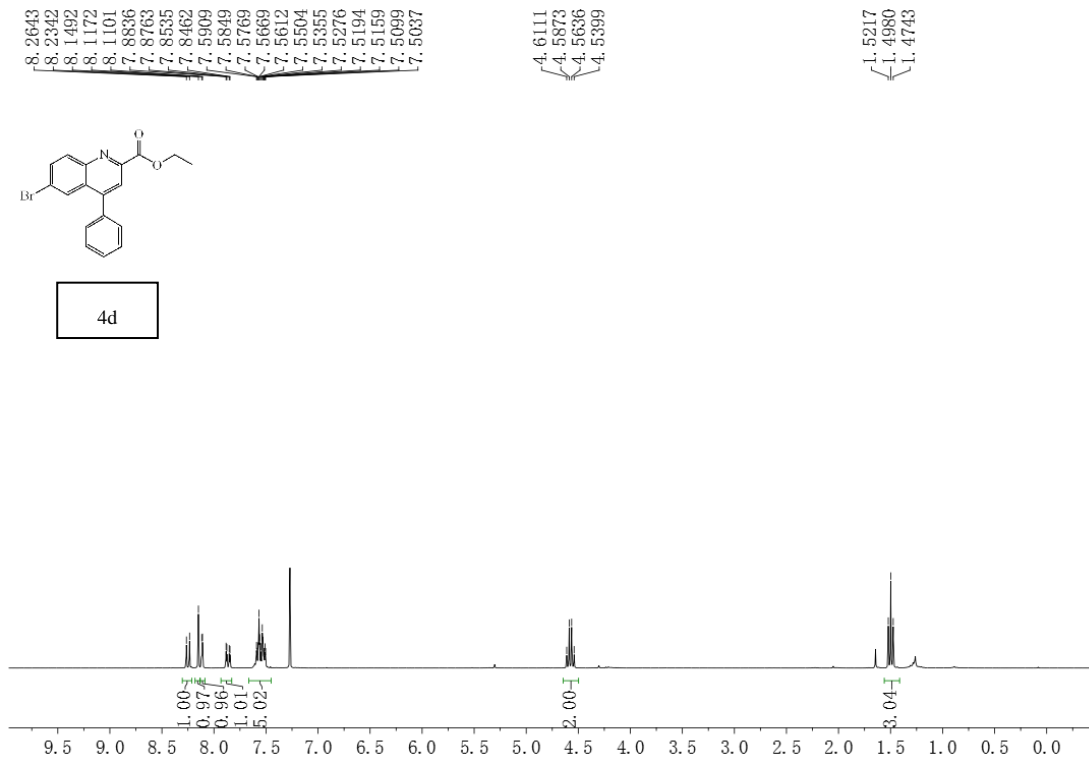



8.3421  
8.3120  
8.1562  
7.9441  
7.9366  
7.7543  
7.7466  
7.7241  
7.7164  
7.6990  
7.6038  
7.5992  
7.5916  
7.5856  
7.5775  
7.5673  
7.5615  
7.5508  
7.5372  
7.5295  
7.5213  
7.5178  
7.5117  
7.5055

4.6138  
4.5900  
4.5663  
4.5426

1.5238  
1.5001  
1.4764

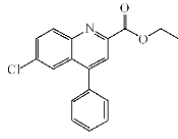

4e

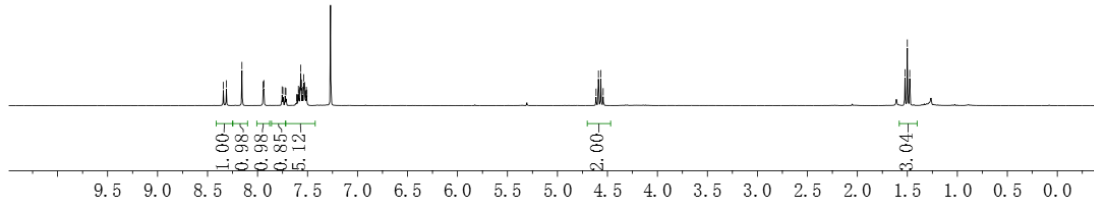

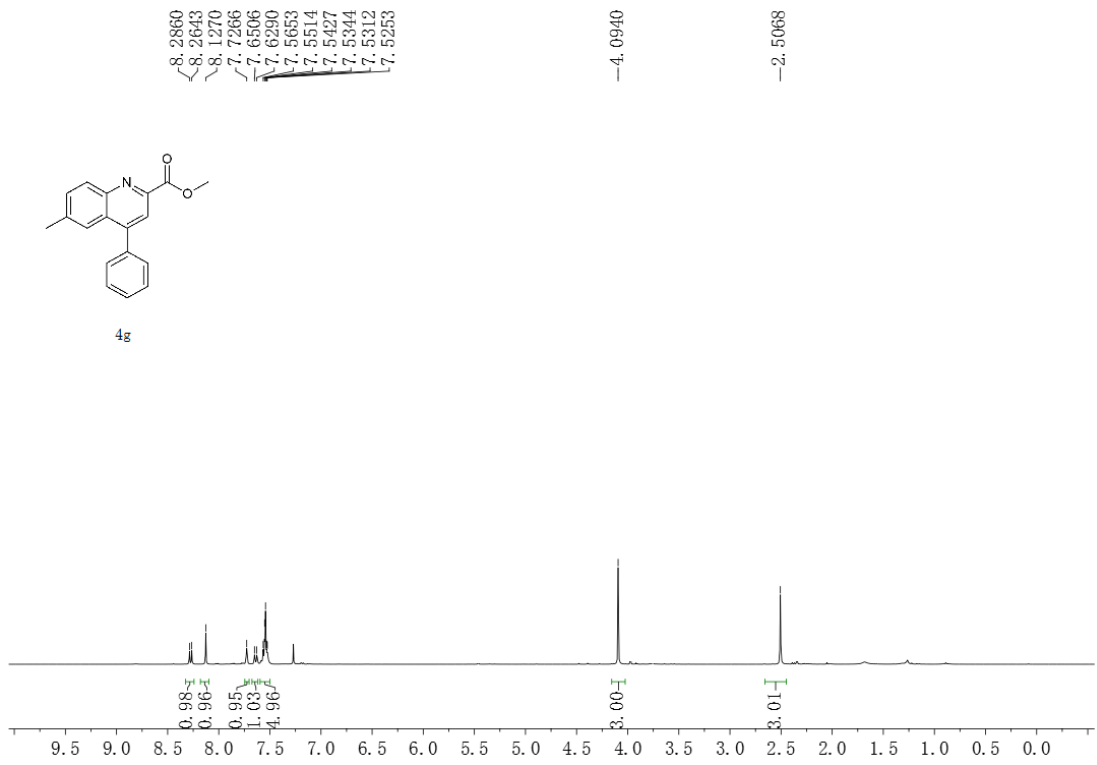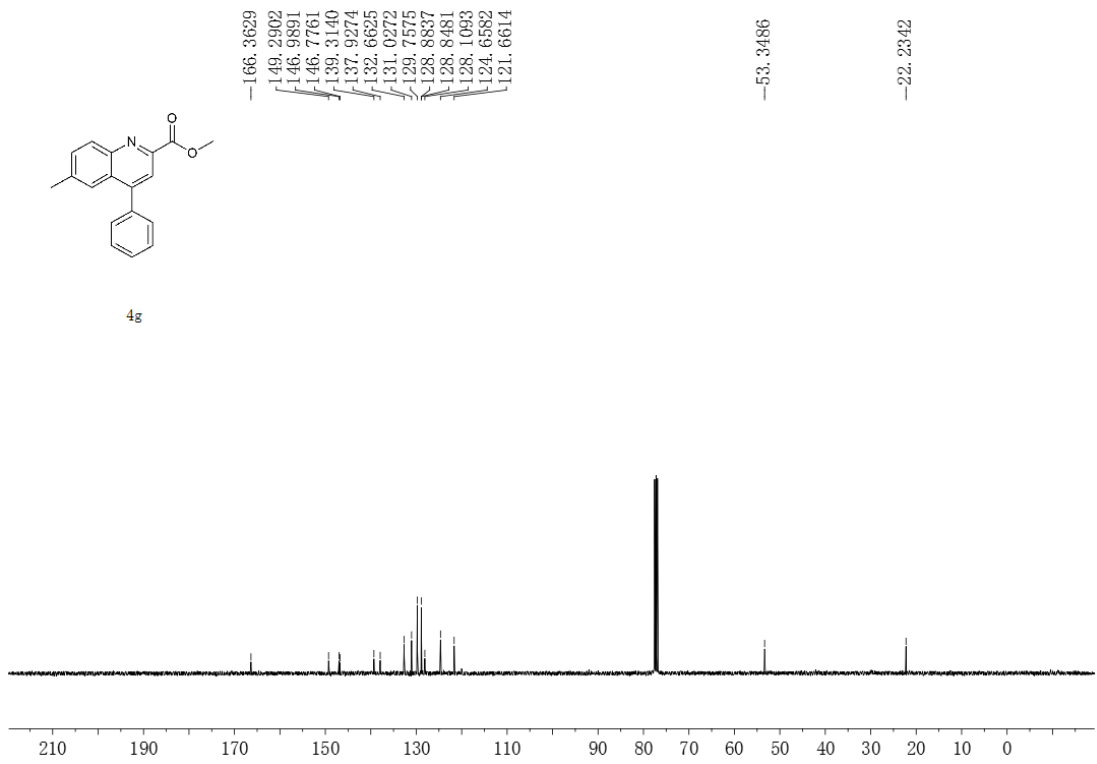

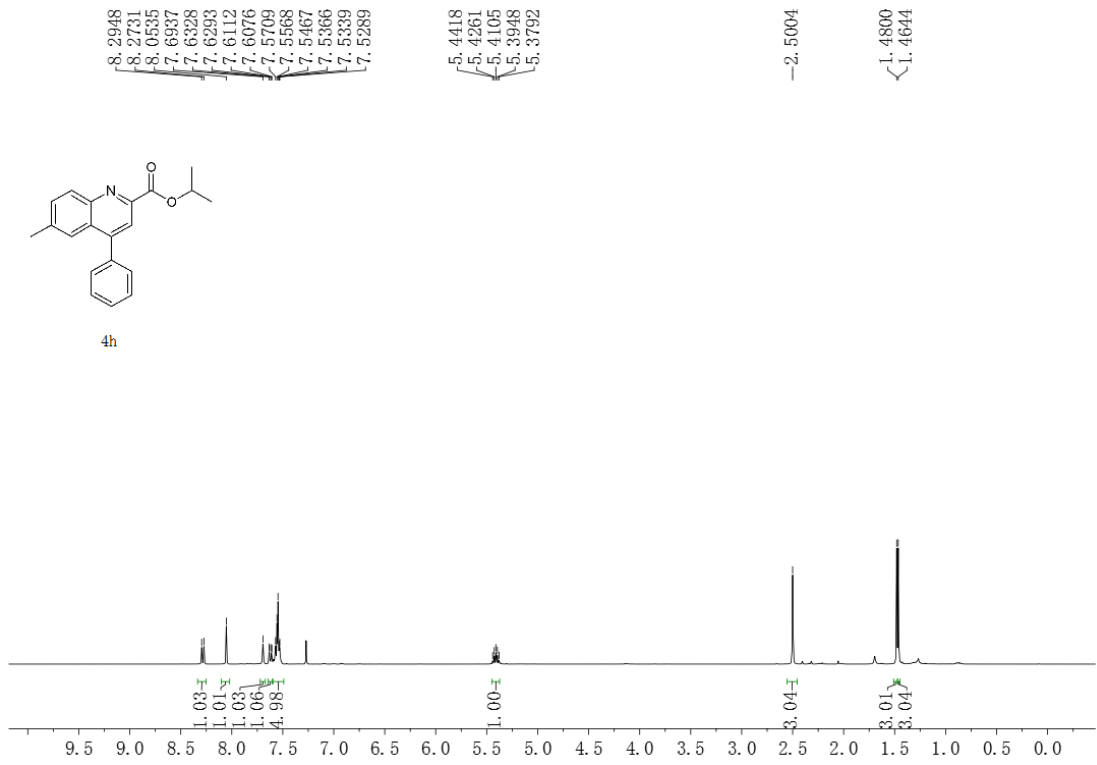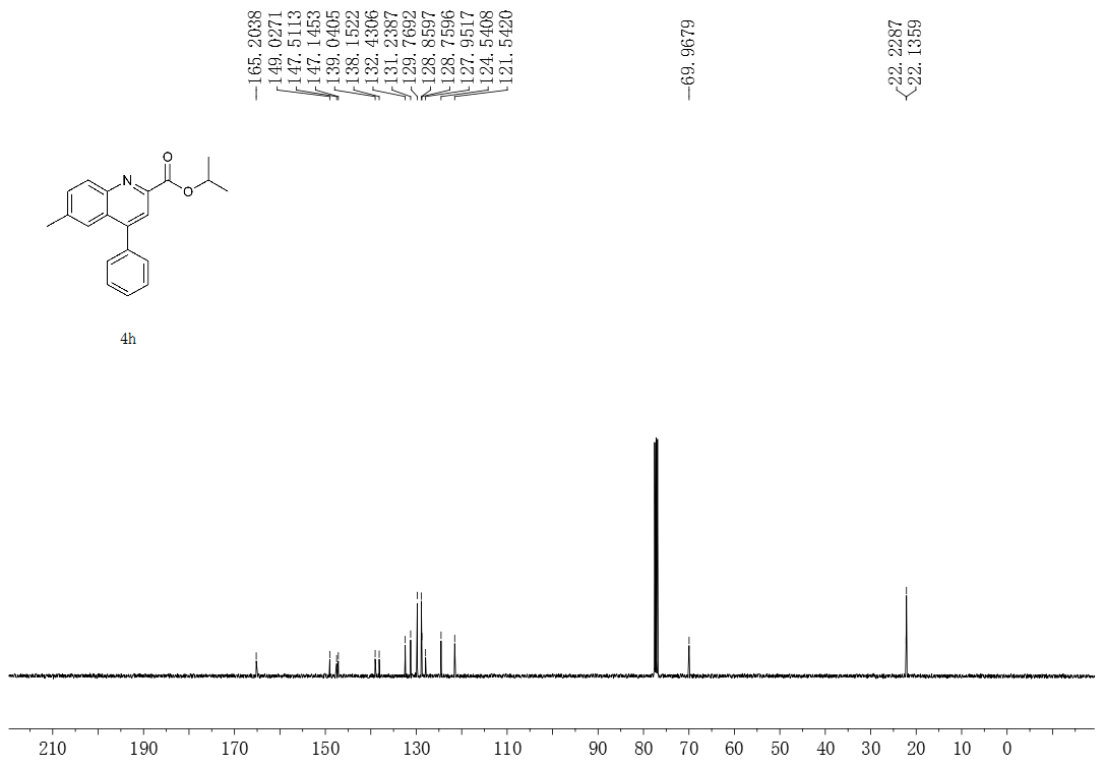

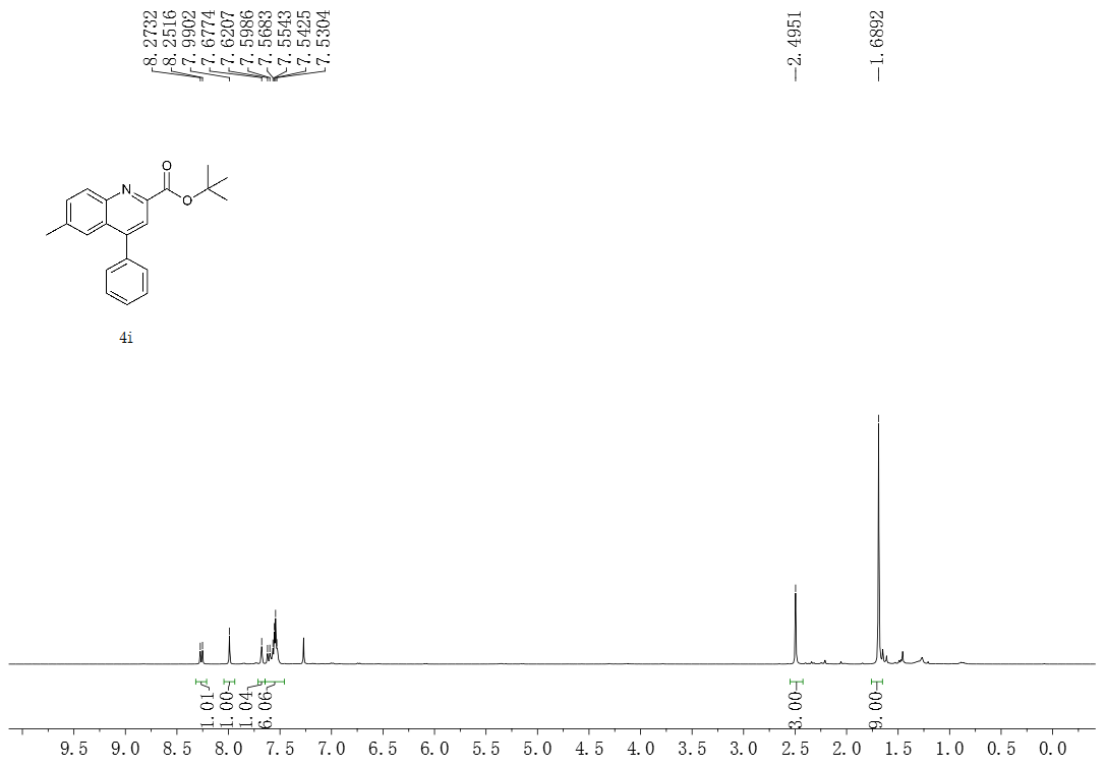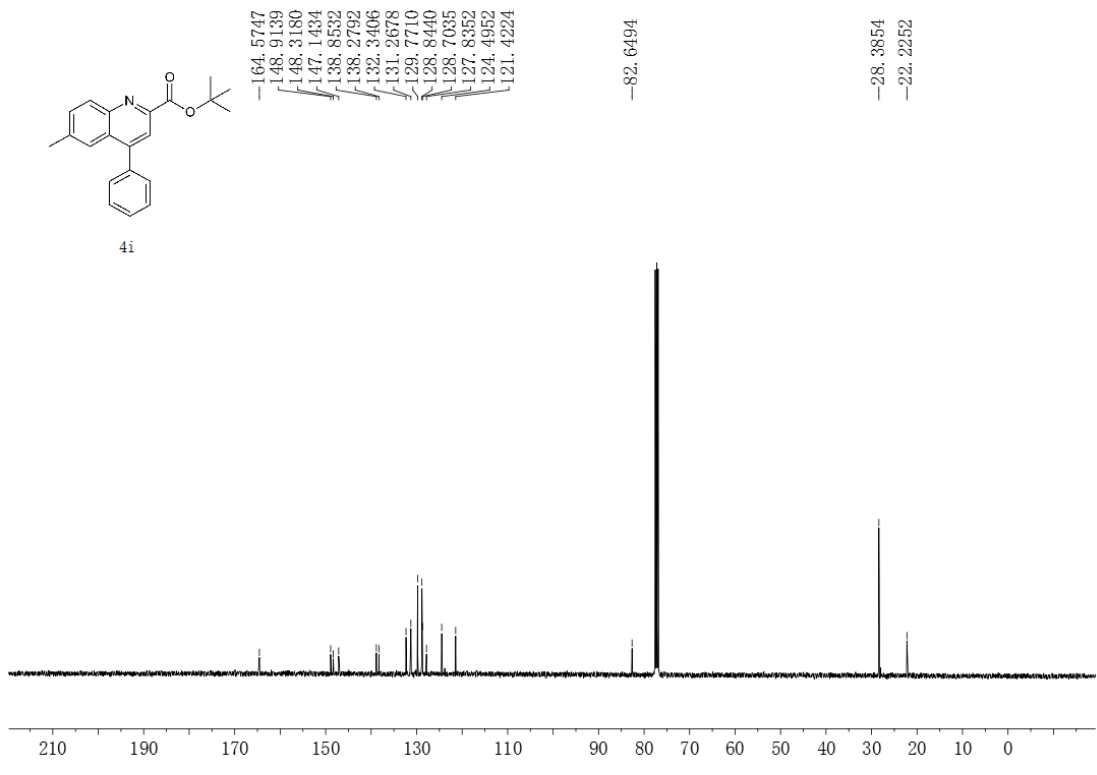

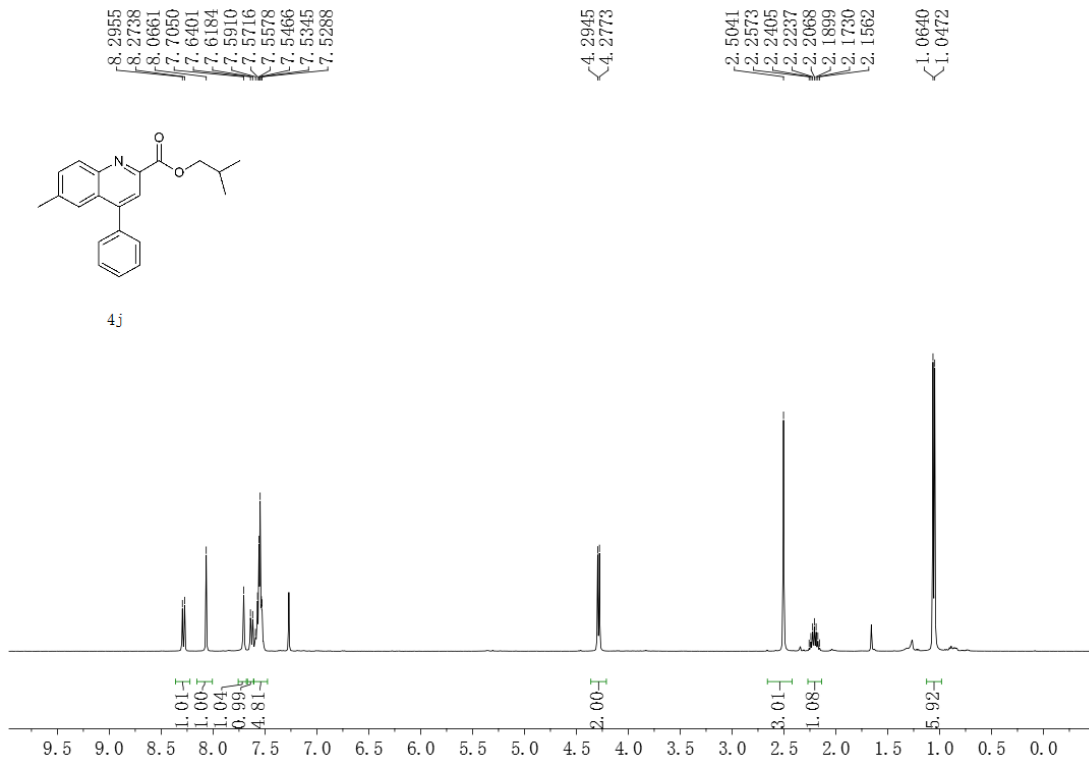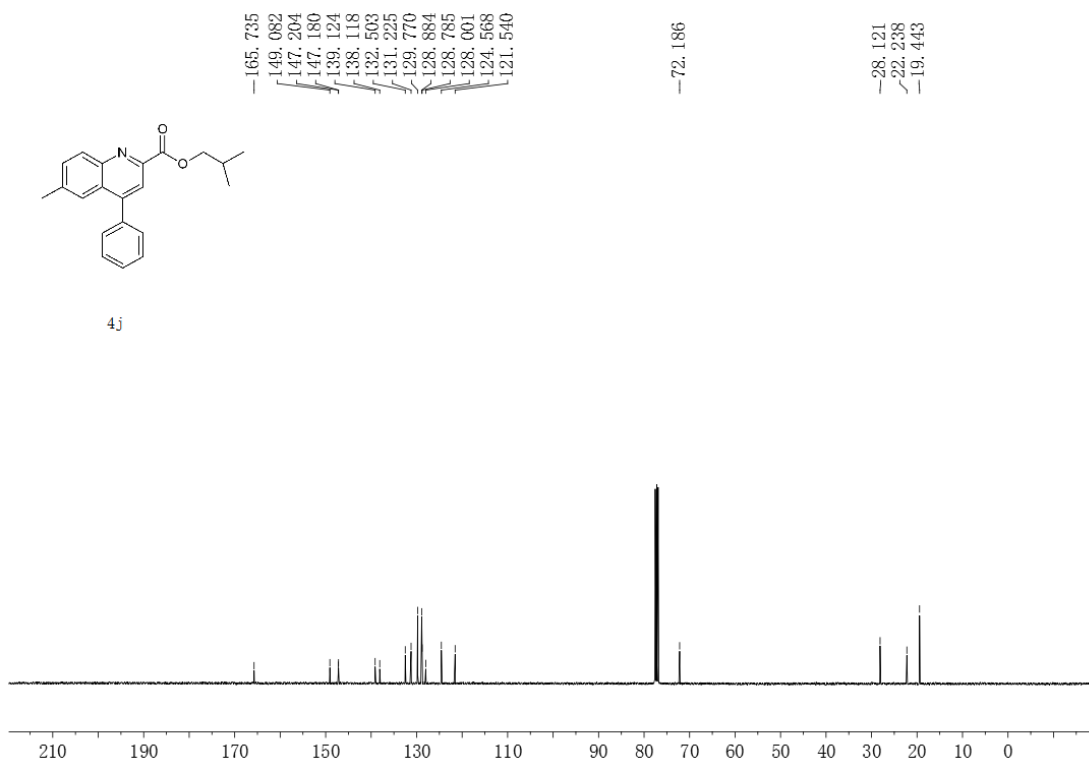

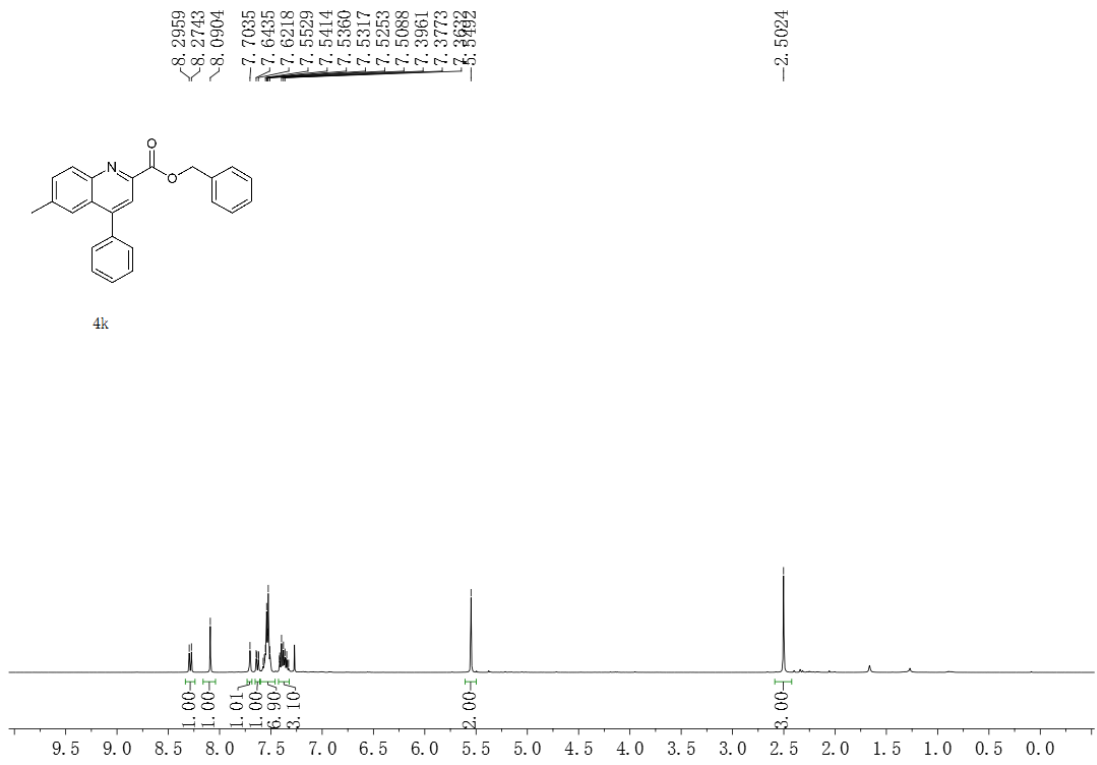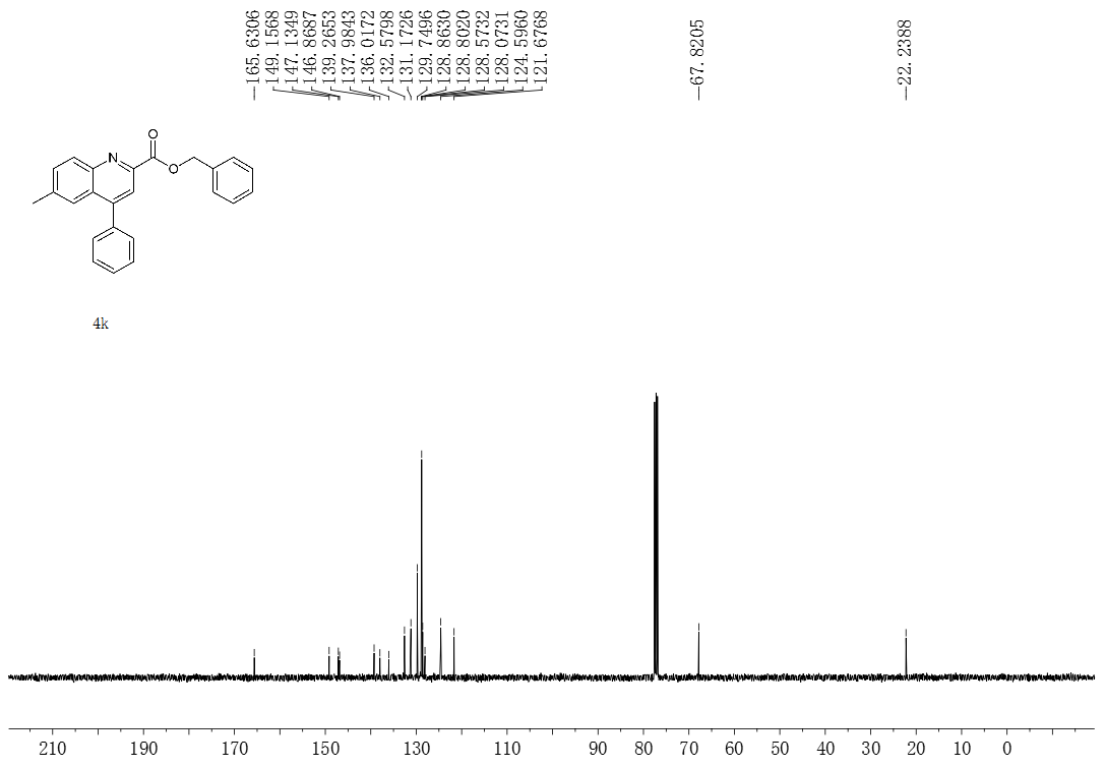

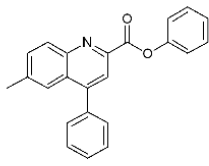

41

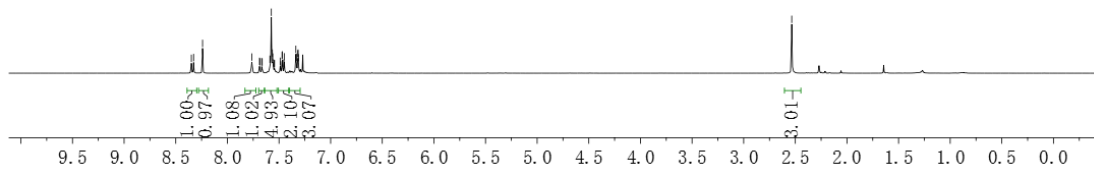

-2.5346

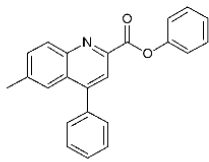

41

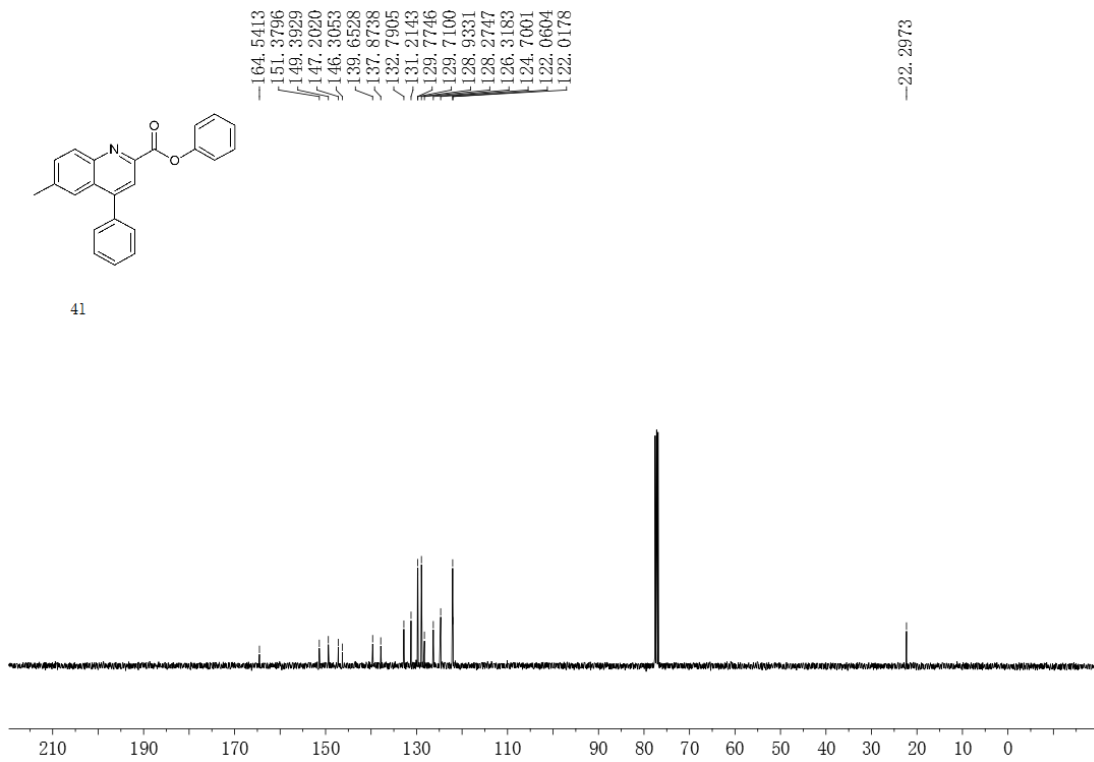

-22.2973

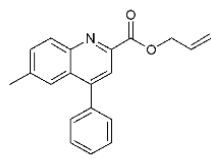

4m

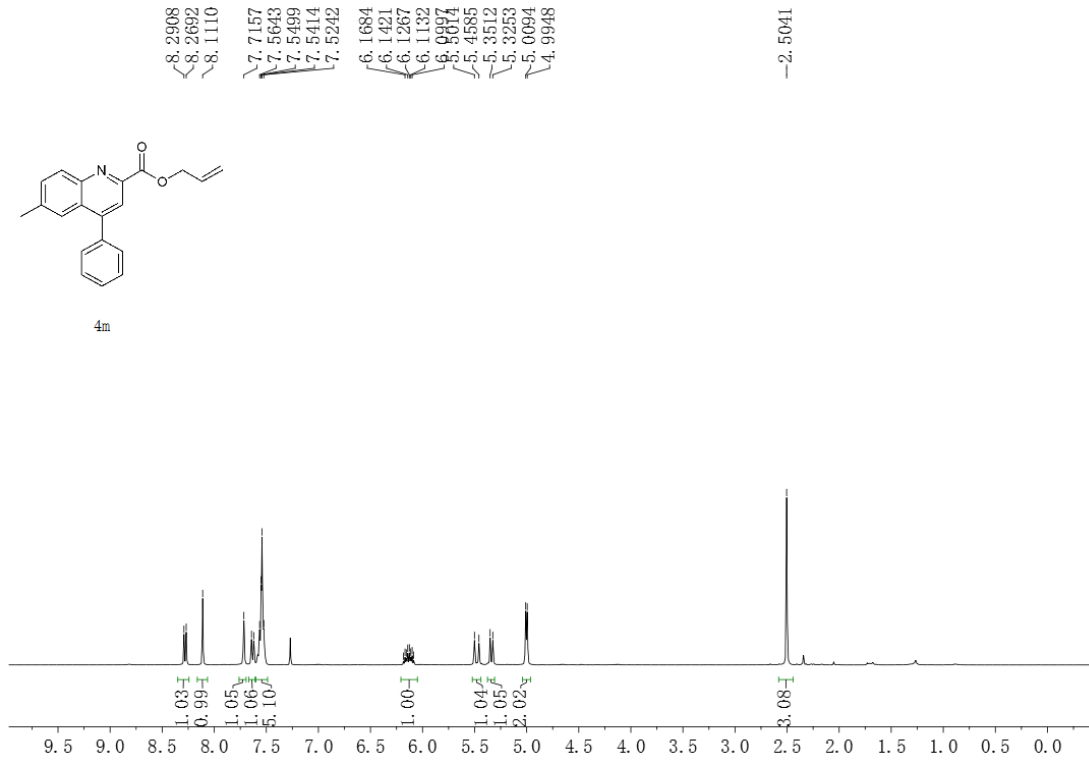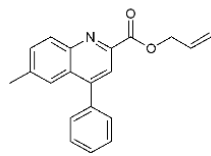

4m

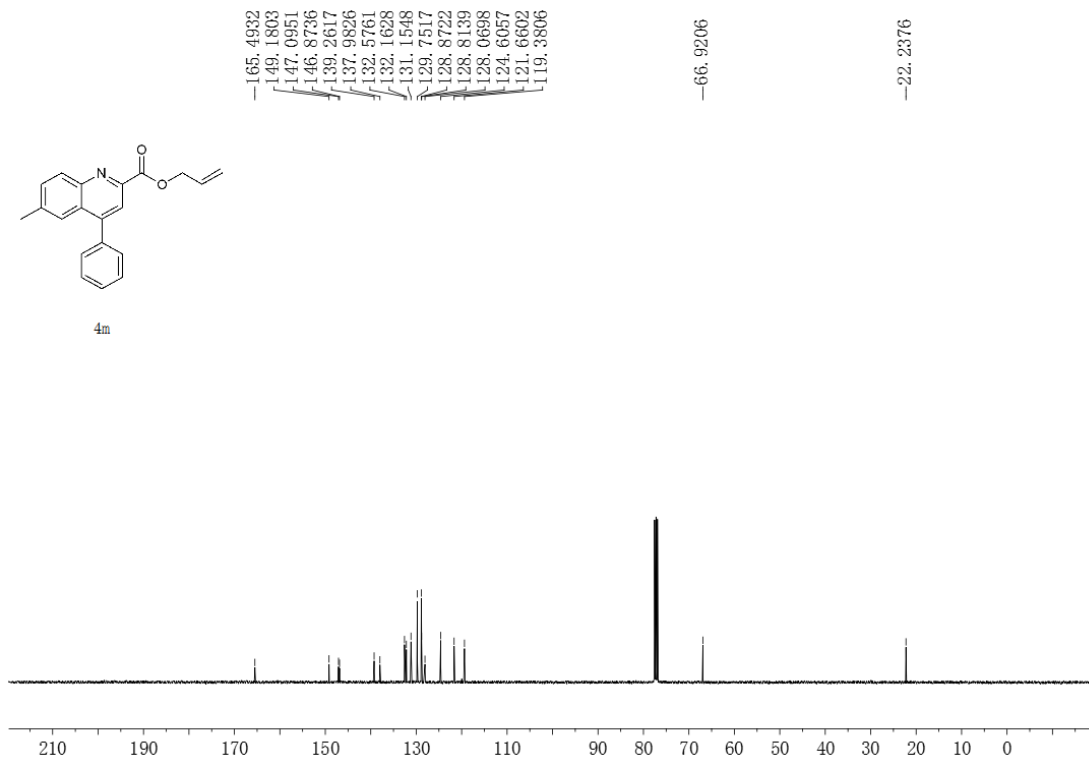



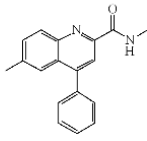

4n

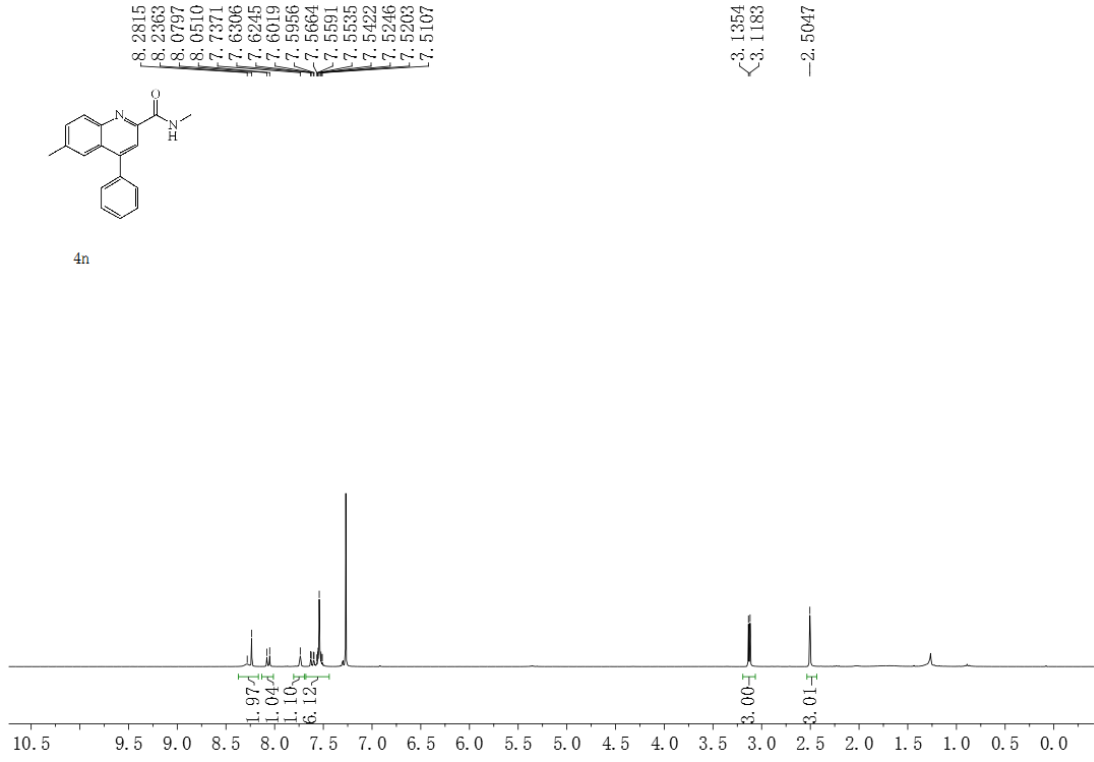

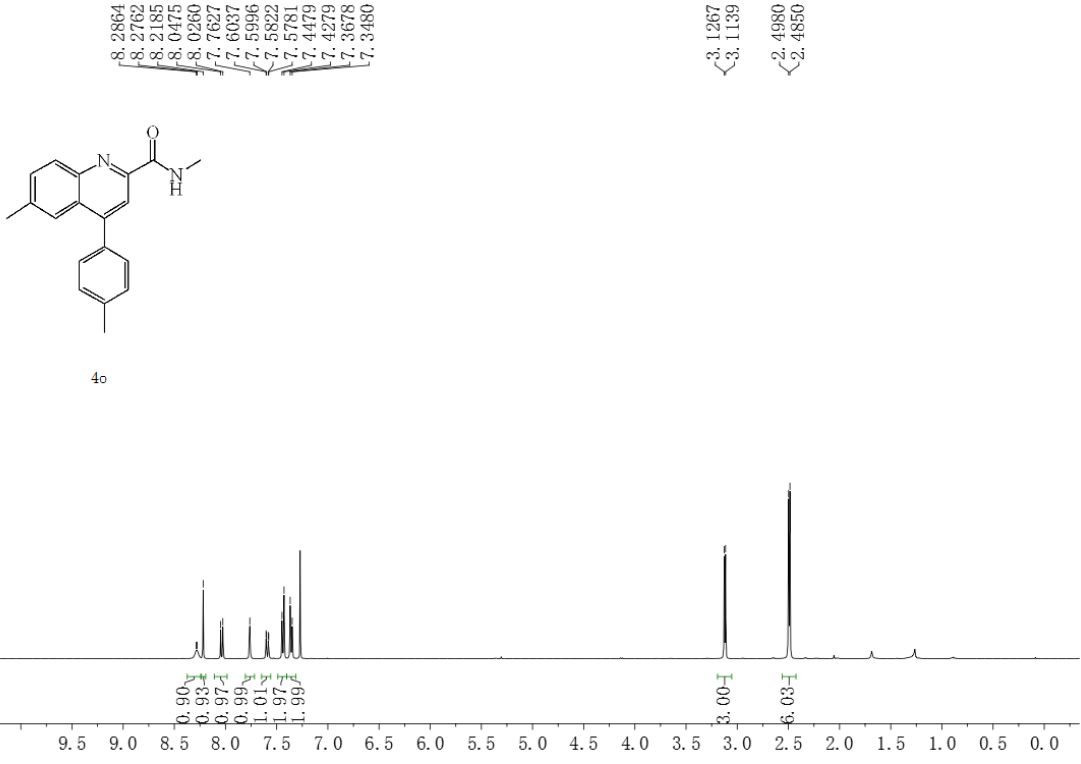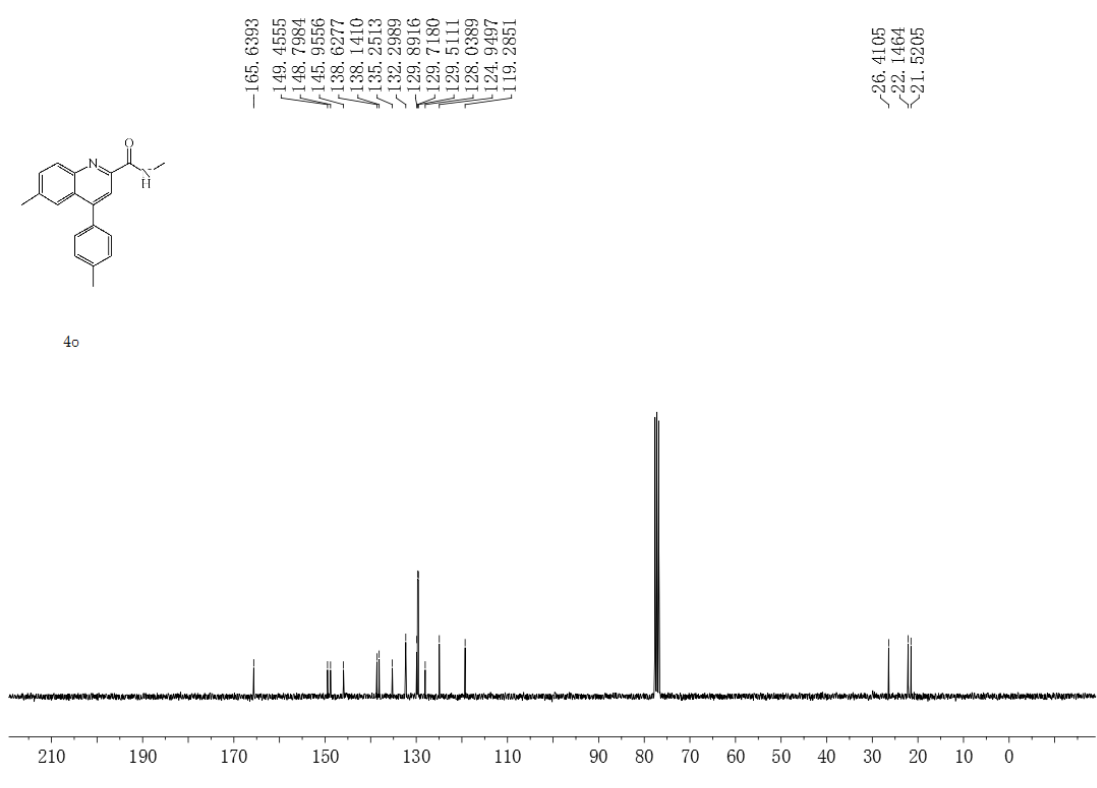

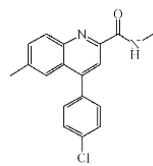

4p

8.2695  
8.2584  
8.2009  
8.0642  
8.0428  
7.6612  
7.6271  
7.6230  
7.6056  
7.6014  
7.5446  
7.5285  
7.5235  
7.4803  
7.4758  
7.4592

3.1301  
3.1173  
-2.5092

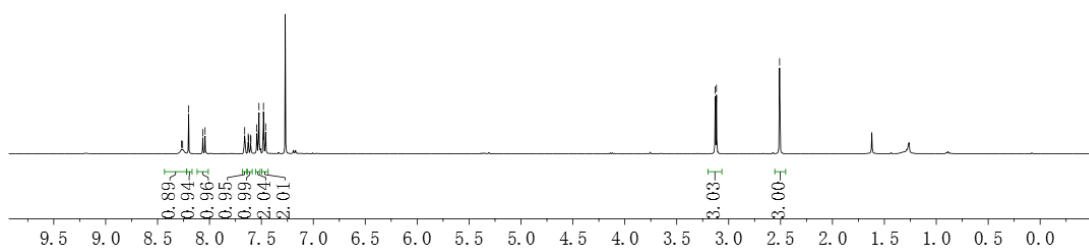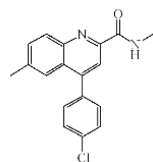

4p

165.4381  
148.8188  
148.0622  
145.9338  
138.6039  
136.5761  
134.9684  
132.5418  
131.0915  
130.0435  
129.1127  
127.7284  
124.5196  
119.2656

-26.4475  
-22.1946

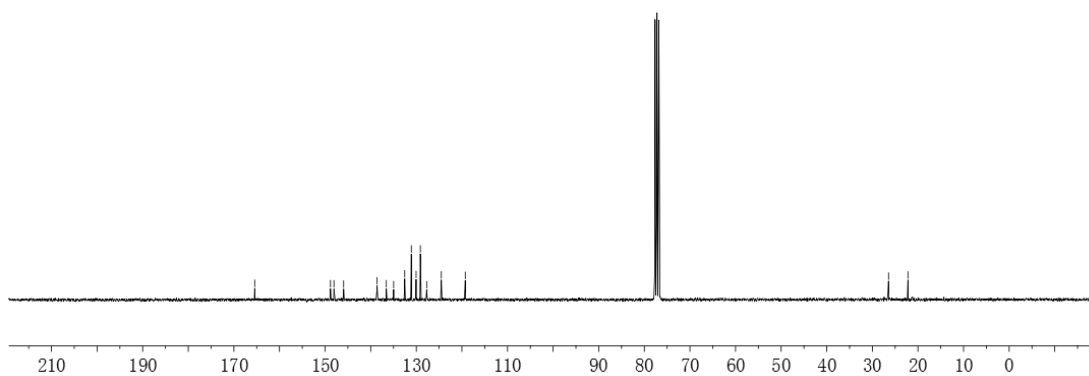

Supplement: c5ob02216a1.pdf [file c5ob02216a1.pdf]
